# Supplementary material for: Halogen bonds as a tool in the design of high energetic materials: evidence from crystal structures and quantum chemical calculations
Source: Royal Society of Chemistry journal article supplement (doi:10.1039/d1ce00854d), 2021-01-01
Supplement: d1ce00854d1.pdf [file d1ce00854d1.pdf]

SUPPORTING INFORMATION

## Halogen bonds as a tool in the design of high energetic materials: evidence from crystal structures and quantum chemical calculations

Aleksandra B. Đunović<sup>b</sup>, Dušan Ž. Veljković<sup>a\*</sup>

### I Cambridge Structural Databank search

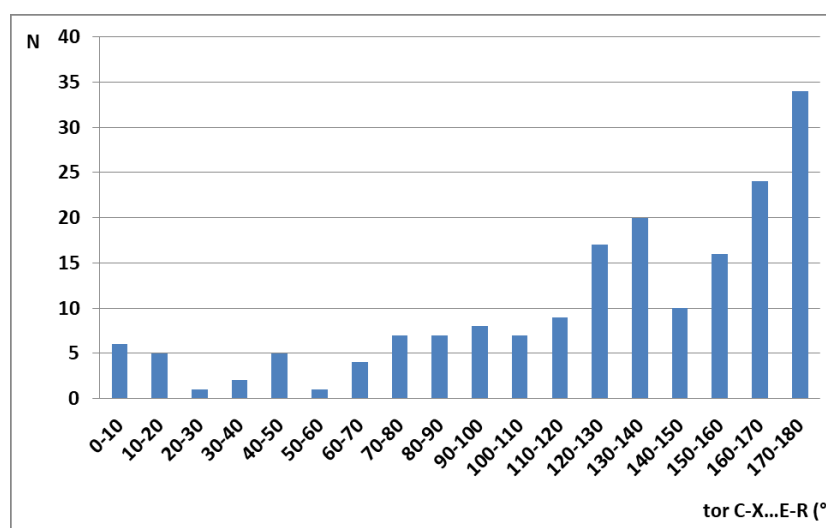

**Figure S1.** Distribution of torsion angle defined by atoms C, X, E, and R in fragments of crystal structures containing halogen bonds.

Peaks in the interval 160 - 180° (58 contacts) indicates that in the majority of contacts mutual orientation of C-X and E-R fragments is antiparallel. This also indicates the existence of contacts between halogen atom (X) and electron-rich atom (E) since in this orientation X and E are orientated towards each other. The number of interactions with the parallel orientation of C-X and E-R fragments (torsion angle values in the interval 0 - 10° is significantly lower (6 contacts).

## II Optimized geometries of model systems A-C

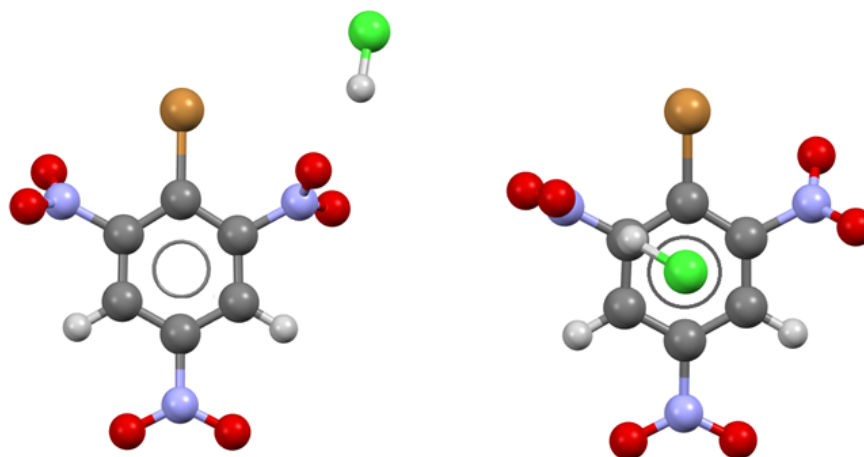

**Figure S2.** Optimized geometries for the distances in the geometries A-C with the strongest interactions. Geometry optimizations for the structures A and B resulted in the same optimized geometry with Cl-H $\cdots$ O interaction (a) while geometry optimization for model system C resulted in geometry with Cl-H $\cdots$ O and Cl $\cdots$  $\pi$  interactions (b).

## III Geometries of model systems

**Table S1:** Geometries of model systems used for quantum chemical calculations - model system A

|    |           |           |           |
|----|-----------|-----------|-----------|
| Br | -1.747569 | -0.000789 | -0.018287 |
| C  | 0.129798  | -0.005005 | -0.008175 |
| C  | 0.850866  | -1.185090 | 0.000729  |
| N  | 0.133497  | -2.478398 | 0.049150  |
| O  | -0.157002 | -2.959950 | -1.016039 |
| O  | -0.028104 | -2.969342 | 1.069847  |
| C  | 2.226002  | -1.199915 | 0.011718  |
| H  | 2.697890  | -2.001728 | 0.025285  |
| C  | 2.874583  | -0.002413 | 0.000292  |
| N  | 4.354256  | 0.011158  | 0.043150  |
| O  | 4.898660  | -1.022298 | -0.345498 |
| O  | 4.920654  | 1.019040  | 0.377342  |
| C  | 2.217882  | 1.205964  | -0.015946 |
| H  | 2.684172  | 2.010401  | -0.014633 |
| C  | 0.849824  | 1.172183  | -0.037163 |
| N  | 0.148573  | 2.466492  | -0.050636 |
| O  | -0.074686 | 2.972053  | -1.087658 |
| O  | -0.122692 | 2.968250  | 0.991633  |
| Cl | -5.147552 | 0.000758  | -0.028789 |
| H  | -5.151476 | 0.028369  | 1.245906  |

**Table S2: Geometries of model systems used for quantum chemical calculations - model system B**

|    |           |           |           |
|----|-----------|-----------|-----------|
| Br | 1.694653  | -0.002896 | -0.001688 |
| C  | -0.182744 | -0.005656 | -0.000015 |
| C  | -0.904769 | -1.185182 | -0.004283 |
| N  | -0.188720 | -2.479050 | -0.057085 |
| O  | 0.108086  | -2.960734 | 1.006304  |
| O  | -0.033910 | -2.970210 | -1.078730 |
| C  | -2.279958 | -1.198940 | -0.006638 |
| H  | -2.752542 | -2.000388 | -0.017169 |
| C  | -2.927525 | -0.000935 | 0.008747  |
| N  | -4.407427 | 0.013781  | -0.024823 |
| O  | -4.950182 | -1.019218 | 0.367330  |
| O  | -4.975130 | 1.022073  | -0.355548 |
| C  | -2.269798 | 1.206934  | 0.020750  |
| H  | -2.735463 | 2.011733  | 0.022288  |
| C  | -0.901661 | 1.172094  | 0.033382  |
| N  | -0.199335 | 2.465858  | 0.042332  |
| O  | 0.030821  | 2.971338  | 1.077885  |
| O  | 0.065771  | 2.967314  | -1.001666 |
| Cl | 5.294648  | 0.002397  | -0.004894 |
| H  | 6.569646  | 0.004272  | -0.006030 |

**Table S3: Geometries of model systems used for quantum chemical calculations - model system C**

|    |           |           |           |
|----|-----------|-----------|-----------|
| Br | 1.986939  | 0.033703  | -1.090648 |
| C  | 0.192738  | 0.019016  | -0.538150 |
| C  | -0.502110 | 1.191635  | -0.304120 |
| N  | 0.190719  | 2.491376  | -0.446490 |
| O  | 0.157798  | 2.988626  | -1.543106 |
| O  | 0.637623  | 2.971562  | 0.490879  |
| C  | -1.815364 | 1.192569  | 0.104173  |
| H  | -2.268033 | 1.989399  | 0.265164  |
| C  | -2.432229 | -0.011136 | 0.263450  |
| N  | -3.836161 | -0.040026 | 0.732060  |
| O  | -4.475982 | 0.992546  | 0.532366  |
| O  | -4.275553 | -1.057482 | 1.201138  |
| C  | -1.800945 | -1.212600 | 0.040601  |
| H  | -2.242022 | -2.021619 | 0.165048  |
| C  | -0.497721 | -1.164882 | -0.374733 |
| N  | 0.177531  | -2.451853 | -0.609057 |
| O  | 0.094400  | -2.942608 | -1.673529 |
| O  | 0.741693  | -2.963410 | 0.302920  |
| Cl | 3.046753  | -0.052374 | 2.348739  |
| H  | 3.422104  | -0.082859 | 3.566855  |
